# Supplementary material for: Atraumatic Restorative Treatment compared to the Hall Technique for occluso-proximal cavities in primary molars: study protocol for a randomized controlled trial
Source: PubMed Central journal article supplement (PMC4815168; doi:10.1186/s13063-016-1270-z), 2016-03-31
Supplement: 13063_2016_1270_MOESM1_ESM.pdf [file 13063_2016_1270_MOESM1_ESM.pdf]

**Participant clinical record**

|                                |                                   |                                                                                              |                                                 |
|--------------------------------|-----------------------------------|----------------------------------------------------------------------------------------------|-------------------------------------------------|
| <b>School:</b>                 |                                   | <b>Class:</b>                                                                                |                                                 |
| <b>Participant name:</b>       |                                   | <b>Gender:</b>                                                                               |                                                 |
| <b>Birth date:</b> ___/___/___ |                                   | <b>Municipality ID:</b>                                                                      |                                                 |
| <b>Elastic:</b> ___/___/___    |                                   | <b>Wong-Baker:</b><br>Initial =<br>Final =                                                   | <b>start:</b> ___:___<br><b>finish:</b> ___:___ |
| <b>1.</b>                      | <b>Participant ID:</b><br>(0-150) |                                                                                              |                                                 |
|                                | <b>Treatment date</b>             | ___/___/___                                                                                  |                                                 |
| <b>2.</b>                      | <b>Operator</b>                   |                                                                                              |                                                 |
|                                | <b>Assistant</b>                  |                                                                                              |                                                 |
| <b>3.</b>                      | <b>Treatment</b>                  | <b>ART</b><br><input type="checkbox"/>                                                       | <b>HALL</b><br><input type="checkbox"/>         |
| <b>4.</b>                      | <b>Adjacent tooth</b>             | <b>Mesial:</b> ( ) Present ( ) Absent                                                        |                                                 |
|                                |                                   | <b>Distal:</b> ( ) Present ( ) Absent                                                        |                                                 |
|                                | <b>Antagonist tooth</b>           | ( ) contact                                                                                  | ( ) no contact                                  |
| <b>5.</b>                      | <b>Tooth:</b><br>_____            | <b>Cavitated surface:</b><br>OM      OD<br><input type="checkbox"/> <input type="checkbox"/> | <b>DMFT/ dmft:</b><br>_____                     |
|                                | <b>OC:</b> _____mm                | <b>MD:</b> _____mm                                                                           | <b>BL:</b> _____mm                              |
| <b>6.</b>                      | <b>OVD</b>                        | Initial =                                                                                    | Final =                                         |
|                                |                                   | 1 week =<br>1 month =<br>6 months =<br>12 months =<br>24 months =<br>36 months =             |                                                 |
| <b>7.</b>                      | <b>Plaque index</b>               | General =                                                                                    |                                                 |
|                                |                                   | Treated tooth =                                                                              |                                                 |
|                                | <b>Gingival health</b>            | General =                                                                                    |                                                 |
|                                |                                   | Treated tooth =                                                                              |                                                 |
| <b>8.</b>                      | <b>Wong Baker faces scale</b>     | Initial =                                                                                    | Final =                                         |
| <b>9.</b>                      | <b>Time of treatments</b>         | <b>start</b><br>___:___                                                                      | <b>finish</b><br>___:___                        |
